# Supplementary material for: Structural variety and dehydration in 3-aminopyridine–hypodiphosphoric acid–water system
Source: Royal Society of Chemistry journal article supplement (doi:10.1039/d3ce00186e), 2023-01-01
Supplement: d3ce00186e1.pdf [file d3ce00186e1.pdf]

## Structural variety and dehydration in 3-aminopyridine–hypodiphosphoric acid–water system

Daria Budzikur-Maciąg,<sup>\*a</sup> Vasyl Kinzhybalo<sup>b</sup> and Katarzyna Ślepokura<sup>\*a</sup>

### Supporting information

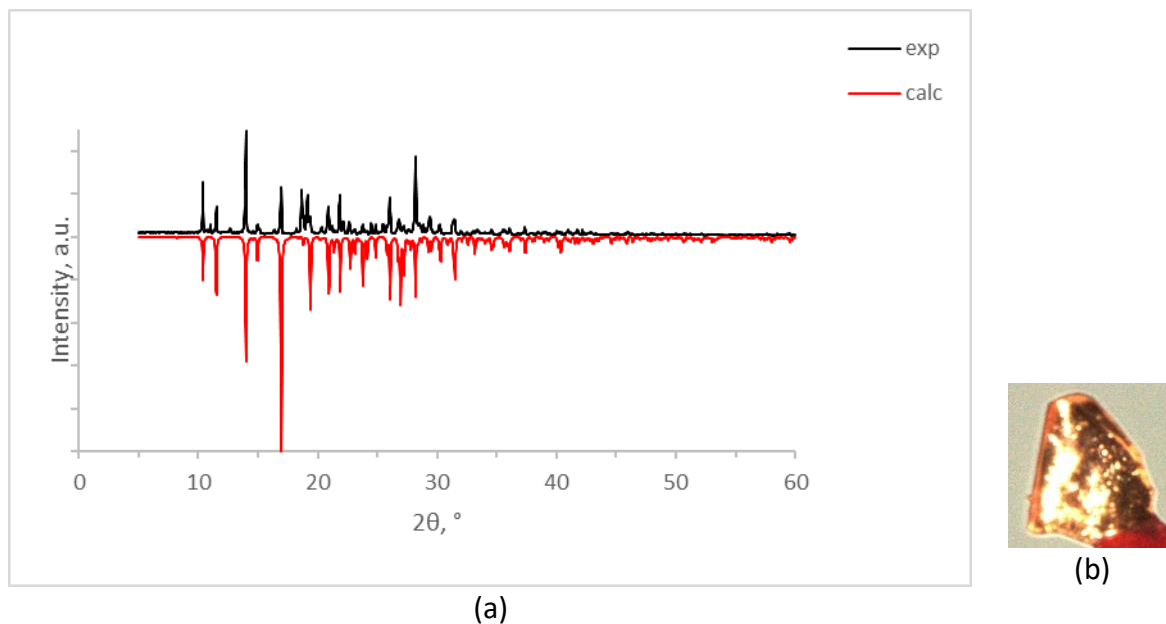

**Figure S1.** (a) X-ray powder diffraction pattern for (1) (black line) compared with the theoretical diffraction pattern of (1)-HTP (red line; shown upside down). (b) Microscopic image of (1) crystal.

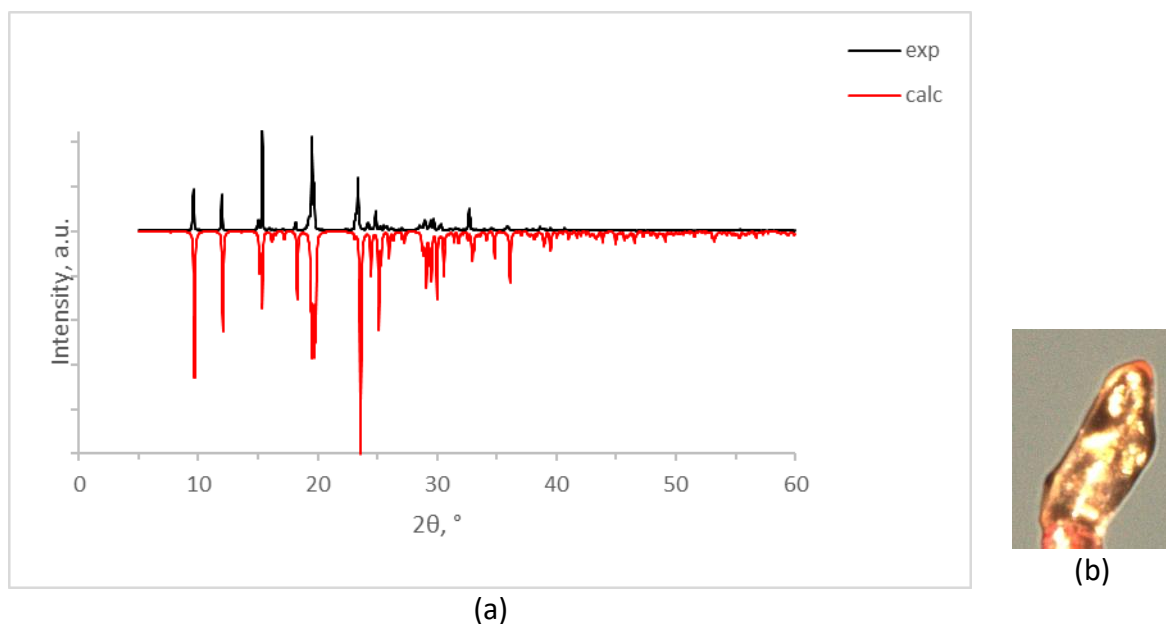

**Figure S2.** (a) X-ray powder diffraction pattern for (3) (black line) compared with the theoretical diffraction pattern of (3) (red line; shown upside down). (b) Microscopic image of (3) crystal.

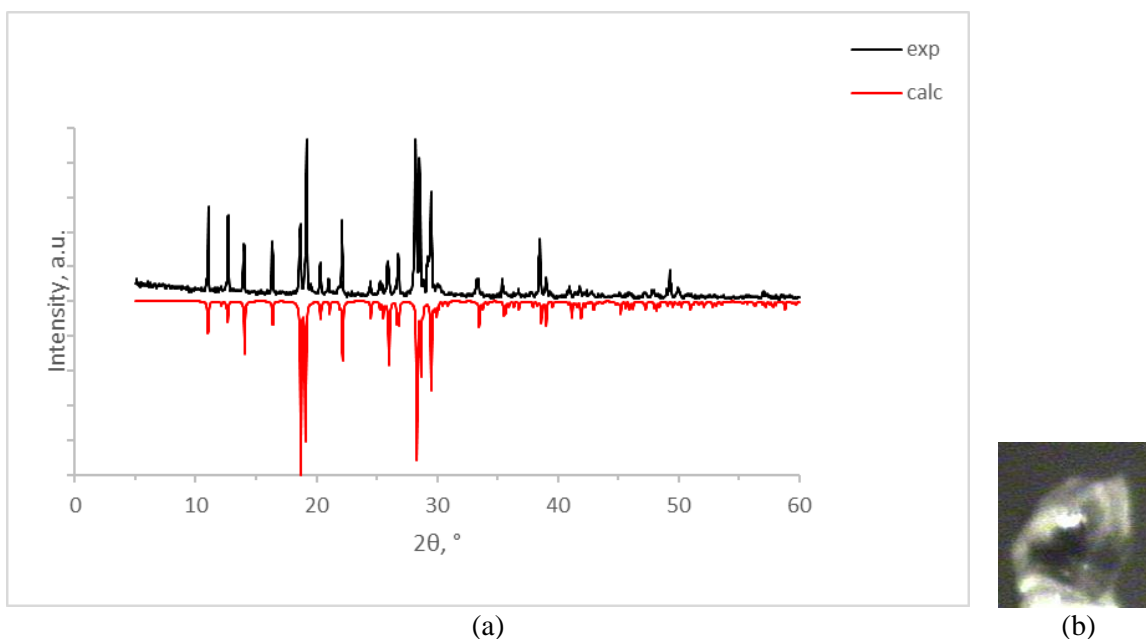

**Figure S3.** (a) X-ray powder diffraction pattern for (5) (black line) compared with the theoretical diffraction pattern of (5) (red line; shown upside down). (b) Microscopic image of (5) crystal.

FT-IR analyses of compounds were performed using nujol mulls technique with a wavelength between 4000 to 400  $\text{cm}^{-1}$ . The recorded spectra are shown in Figures S4-S6. The absorption frequencies around 2925, 1462, 1377  $\text{cm}^{-1}$  are derived from nujol. Absorption frequencies 3398-3311  $\text{cm}^{-1}$  (N-H stretching), 3198-3128  $\text{cm}^{-1}$  (C-H stretching), 2725-2669  $\text{cm}^{-1}$  (N/O-H stretching), 1658-1612  $\text{cm}^{-1}$  (N-H in-plane bending), 1582-1290  $\text{cm}^{-1}$  (aromatic C=C stretching), 950-700  $\text{cm}^{-1}$  (ring breathing), 670-620  $\text{cm}^{-1}$  ( $\text{NH}_2$  out-of-plane bending) and 560-552  $\text{cm}^{-1}$  (C-N-C out-of-plane bending) confirm the 3-aminopyridinium ring in the crystals. The visible bands between 1350-1260  $\text{cm}^{-1}$  correspond to the P-O(H) group, so it can be concluded that the hypodiphosphate anions are not completely deprotonated. In the frequency range 1154-894  $\text{cm}^{-1}$  bands from the P-O functional group are visible, and in the range 724-449  $\text{cm}^{-1}$  – O-P-O groups.

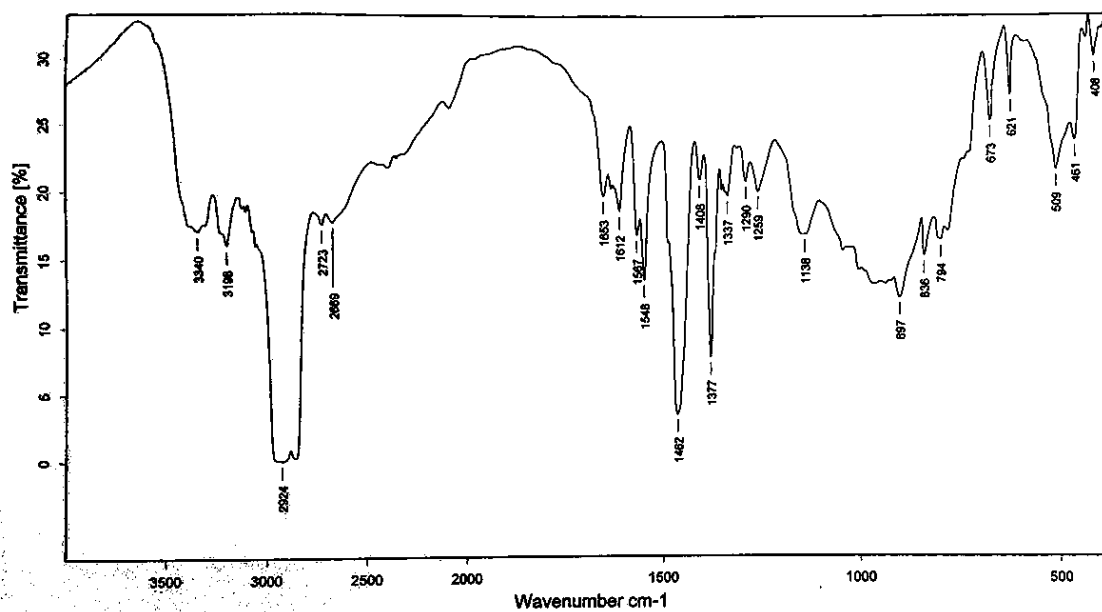

Figure S4. FT-IR spectrum of (1).

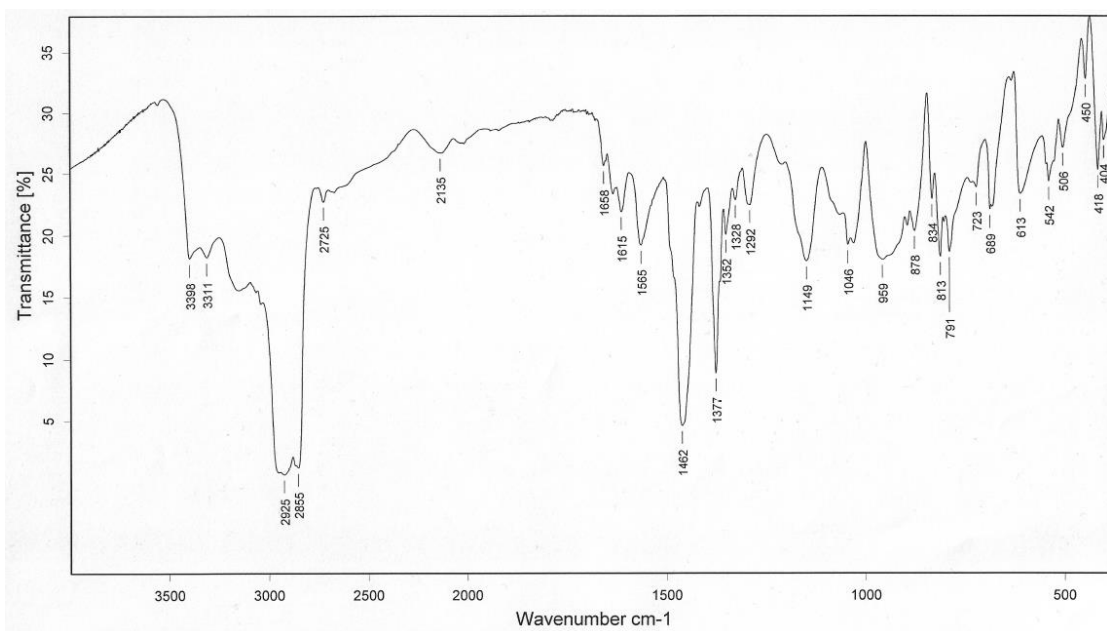

Figure S5. FT-IR spectrum of (3).

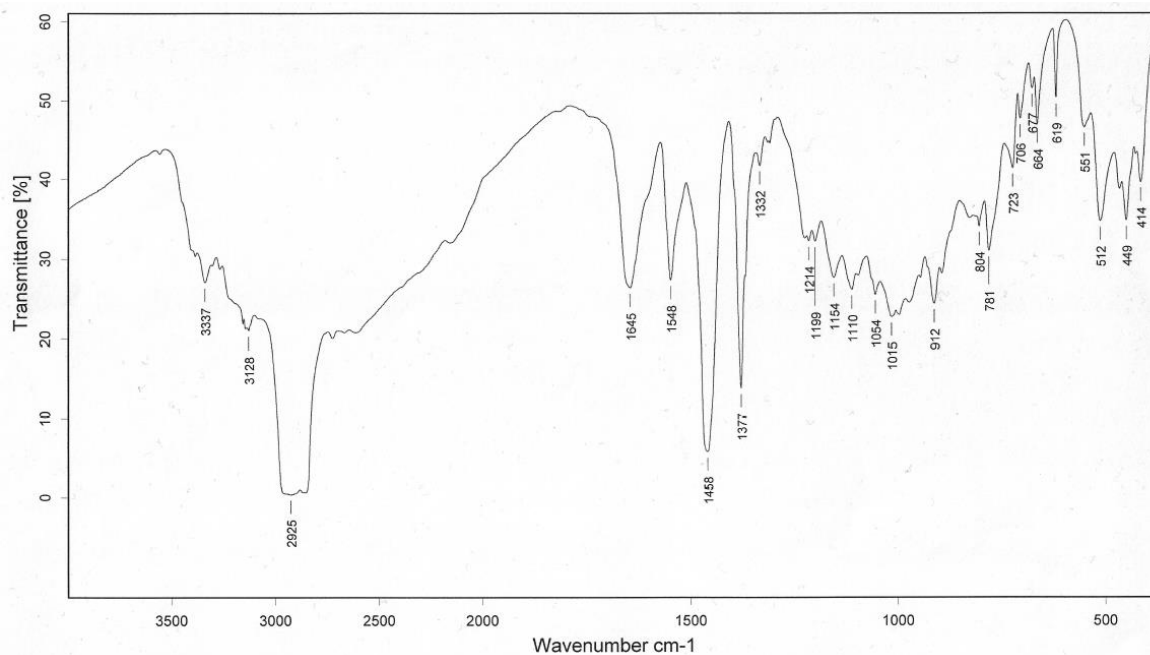

**Figure S6.** FT-IR spectrum of (5).

Almost all atoms of the cation in (1) are involved in 3-aminopyridinium $\cdots$ hypodiphosphate contacts (the exception is C5 atom). Characteristic motifs are observed –  $R_2^2(10)$  and  $R_2^2(9)$  – involving N3 or N1 nitrogen atom, an adjacent carbon atom and one or two oxygen atoms from hypodiphosphate anions. In the case of *C* and *D* of (1)-LTP cations, the  $\text{NH}_2$  group is involved in  $R_2^2(6)$  ring formation. In *B* and *C* cations, water molecules are also involved in the formation of  $3ap\cdots PP$  supramolecular motifs, giving rise to  $R_3^3(10)$  ring.

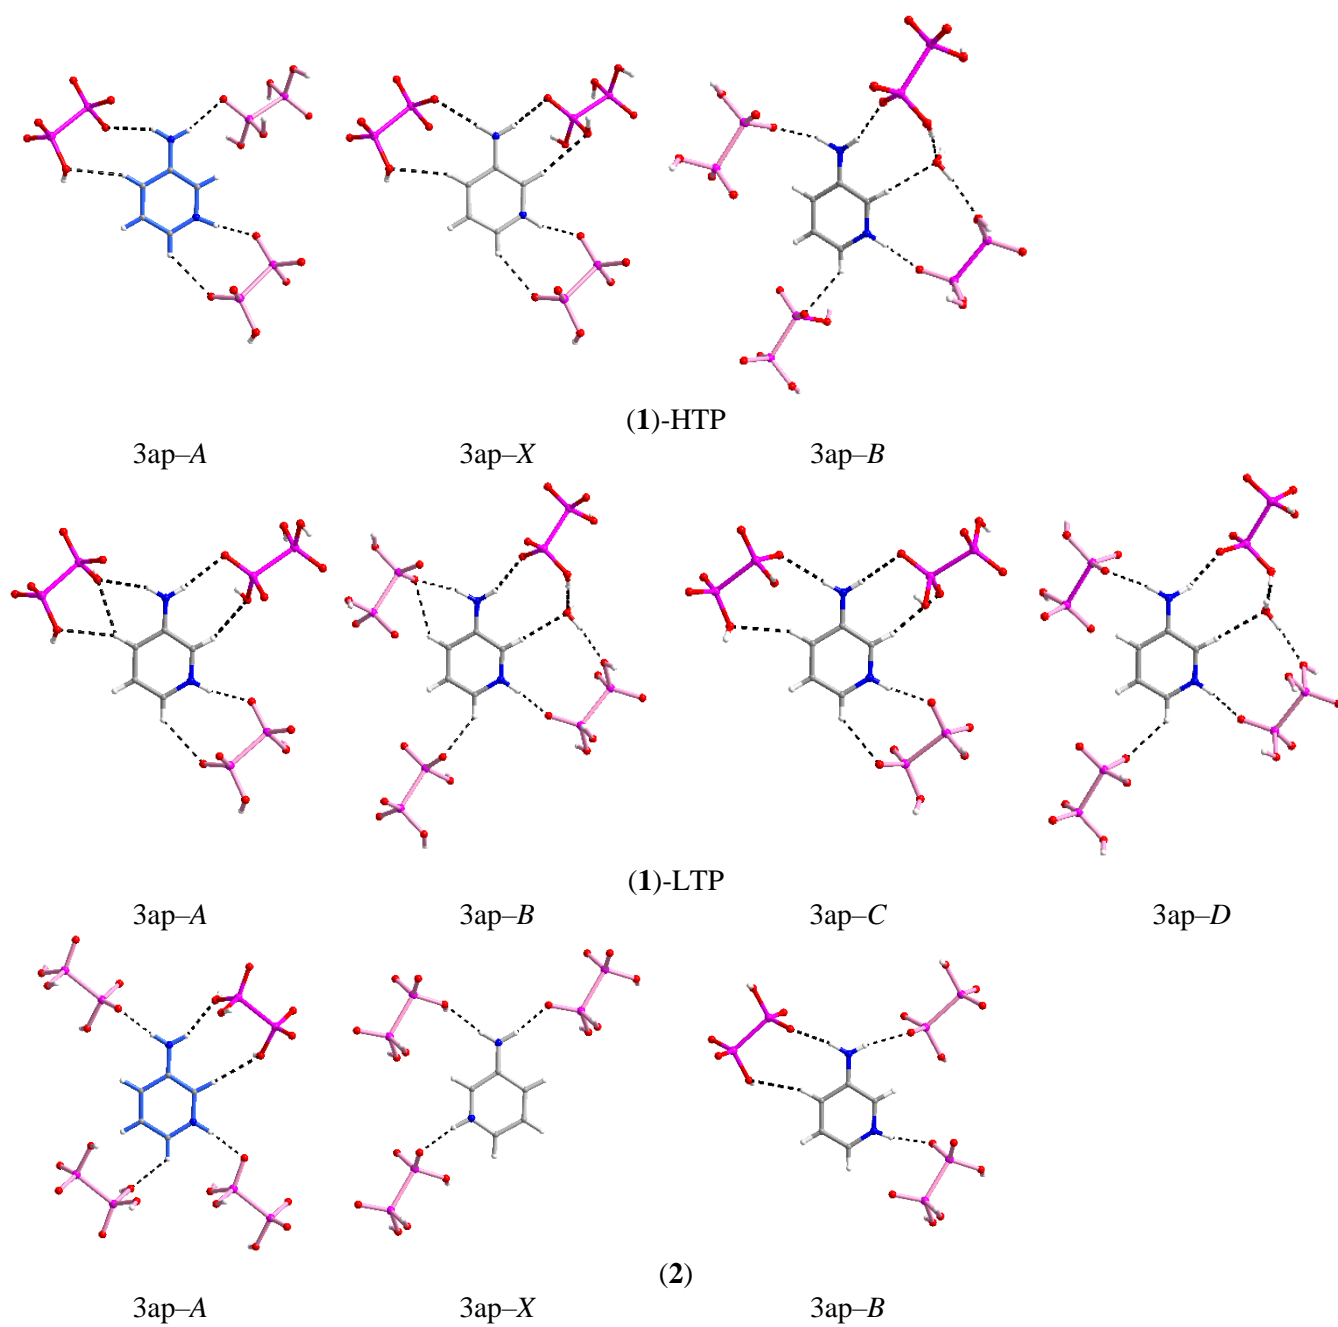

**Figure S7.** Hydrogen bond connections between the anions and the cations in the crystals of (1) and (2).

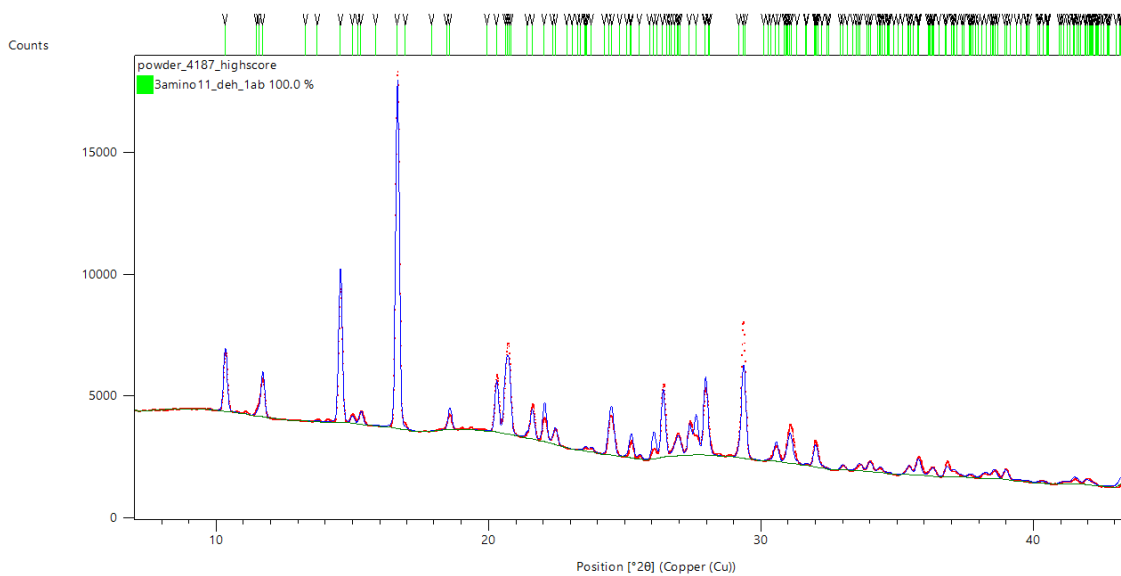

**Figure S8.** The powder diffraction pattern (range  $2\theta$  7–43°) for (2) obtained in the dehydration process of (1) performed on a Boetius PHMK apparatus at 390 K.

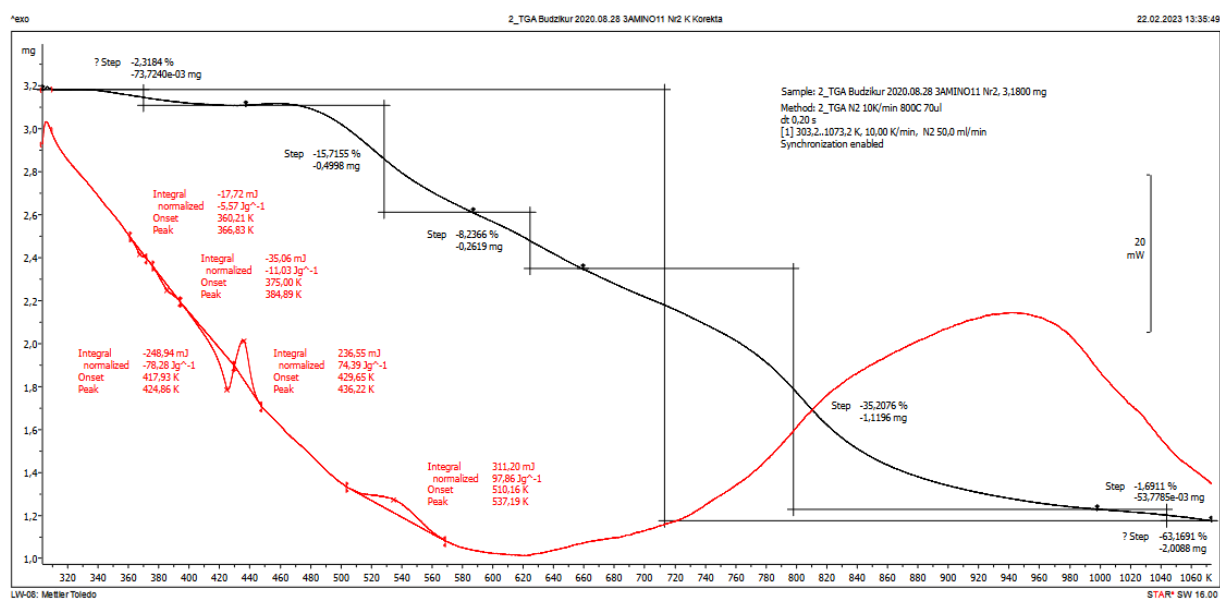

**Figure S9.** The TGA curve for (1) ( $m = 3.1800$  mg).

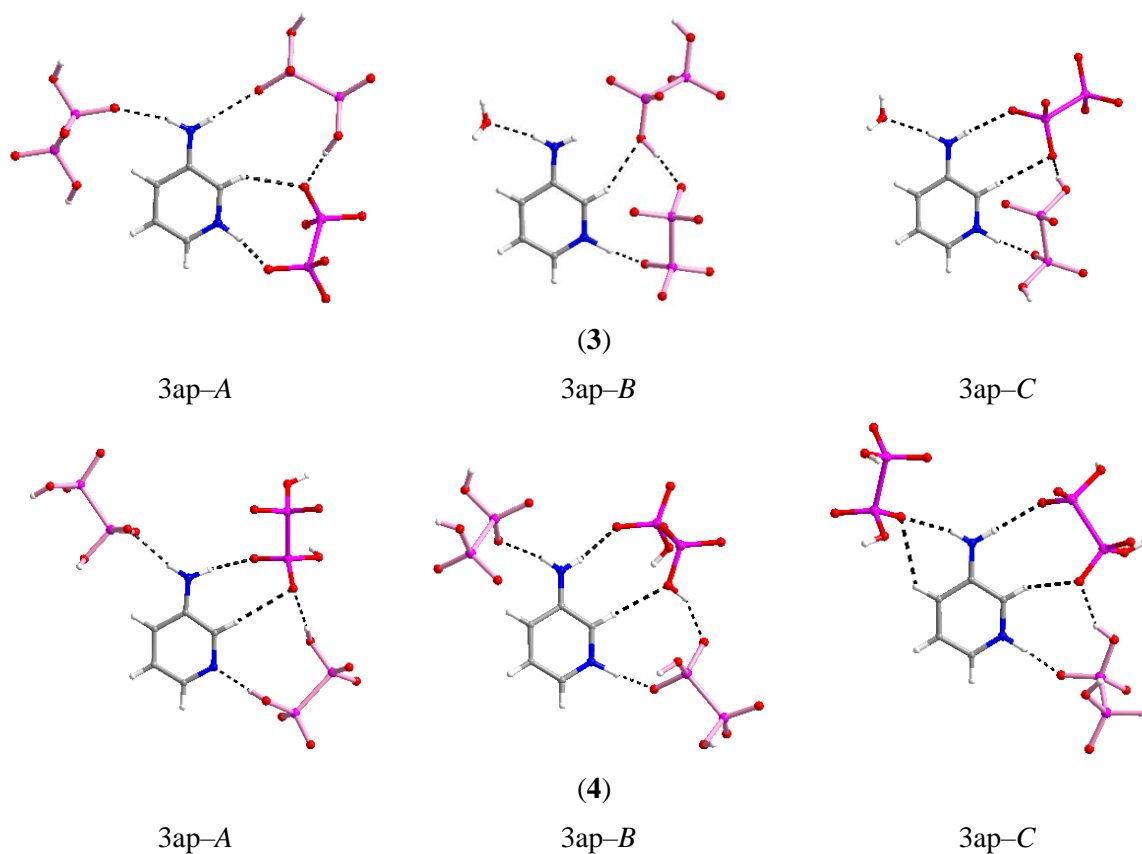

**Figure S10.** Hydrogen bond connections between the anions and the cations in the crystals of (3) and (4).

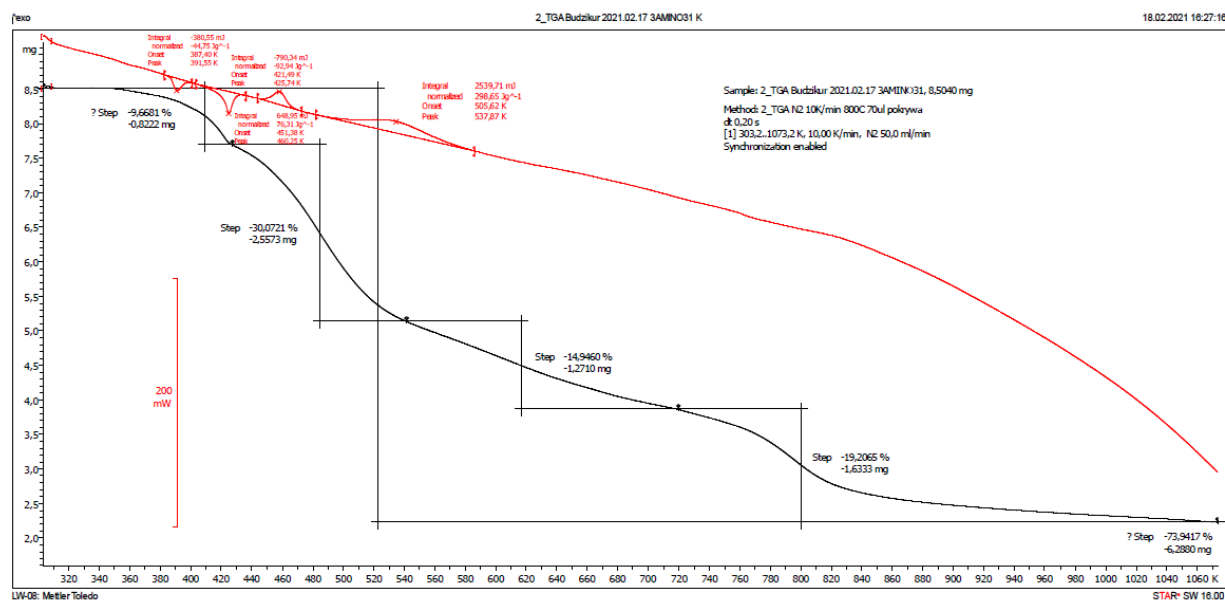

**Figure S11.** The TGA curve for (3) ( $m = 8.504$  mg).

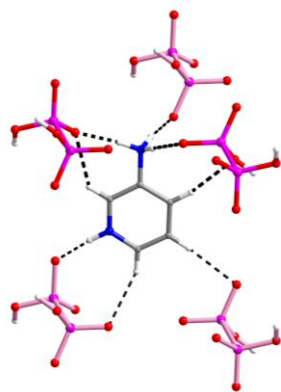

(5)

**Figure S12.** Hydrogen bond connections between the anions and the cation in the crystal of (5).**Table S1.** Selected geometric parameters (Å, °) for (1)-HTP

|                 |           |                                            |           |
|-----------------|-----------|--------------------------------------------|-----------|
| P1A—O1A         | 1.5017(8) | P2A—O6A                                    | 1.5645(8) |
| P1A—O2A         | 1.5202(7) | P1B—O1B                                    | 1.4879(8) |
| P1A—O3A         | 1.5652(8) | P1B—O2B                                    | 1.5454(8) |
| P1A—P2A         | 2.1842(5) | P1B—O3B                                    | 1.5489(7) |
| P2A—O4A         | 1.5012(8) | P1B—P1B <sup>i</sup>                       | 2.1827(6) |
| P2A—O5A         | 1.5110(9) |                                            |           |
| O1A—P1A—O2A     | 114.51(4) | O4A—P2A—P1A                                | 107.98(4) |
| O1A—P1A—O3A     | 112.15(4) | O5A—P2A—P1A                                | 108.03(3) |
| O2A—P1A—O3A     | 107.32(4) | O6A—P2A—P1A                                | 104.47(3) |
| O1A—P1A—P2A     | 108.11(3) | O1B—P1B—O2B                                | 114.43(5) |
| O2A—P1A—P2A     | 107.27(3) | O1B—P1B—O3B                                | 113.34(5) |
| O3A—P1A—P2A     | 107.13(4) | O2B—P1B—O3B                                | 104.78(4) |
| O4A—P2A—O5A     | 117.05(5) | O1B—P1B—P1B <sup>i</sup>                   | 110.91(4) |
| O4A—P2A—O6A     | 112.80(4) | O2B—P1B—P1B <sup>i</sup>                   | 106.89(4) |
| O5A—P2A—O6A     | 105.72(5) | O3B—P1B—P1B <sup>i</sup>                   | 105.85(3) |
| O1A—P1A—P2A—O4A | 43.59(4)  | O1B—P1B—P1B <sup>i</sup> —O1B <sup>i</sup> | 180       |
| O2A—P1A—P2A—O4A | -80.38(5) | O2B—P1B—P1B <sup>i</sup> —O1B <sup>i</sup> | 54.63(5)  |
| O3A—P1A—P2A—O4A | 164.66(4) | O3B—P1B—P1B <sup>i</sup> —O1B <sup>i</sup> | -56.68(5) |
| O1A—P1A—P2A—O5A | 171.07(4) | O1B—P1B—P1B <sup>i</sup> —O2B <sup>i</sup> | -54.63(5) |
| O2A—P1A—P2A—O5A | 47.10(4)  | O2B—P1B—P1B <sup>i</sup> —O2B <sup>i</sup> | 180       |
| O3A—P1A—P2A—O5A | -67.87(5) | O3B—P1B—P1B <sup>i</sup> —O2B <sup>i</sup> | 68.69(5)  |
| O1A—P1A—P2A—O6A | -76.71(4) | O1B—P1B—P1B <sup>i</sup> —O3B <sup>i</sup> | 56.68(5)  |
| O2A—P1A—P2A—O6A | 159.32(4) | O2B—P1B—P1B <sup>i</sup> —O3B <sup>i</sup> | -68.69(5) |
| O3A—P1A—P2A—O6A | 44.35(5)  | O3B—P1B—P1B <sup>i</sup> —O3B <sup>i</sup> | 180       |

Symmetry code: (i)  $-x, -y, -z+1$ .



**Table S2.** Selected geometric parameters (Å, °) for (1)-LTP

|                 |           |                 |            |
|-----------------|-----------|-----------------|------------|
| P1A—O1A         | 1.5038(7) | P2B—O4B         | 1.4916(7)  |
| P1A—O2A         | 1.5224(7) | P2B—O5B         | 1.5434(7)  |
| P1A—O3A         | 1.5667(7) | P2B—O6B         | 1.5530(7)  |
| P1A—P2A         | 2.1837(5) | P1C—O1C         | 1.5077(7)  |
| P2A—O4A         | 1.5047(7) | P1C—O2C         | 1.5144(7)  |
| P2A—O5A         | 1.5105(7) | P1C—O3C         | 1.5624(8)  |
| P2A—O6A         | 1.5676(8) | P1C—P2C         | 2.1836(5)  |
| P1B—O1B         | 1.4918(7) | P2C—O4C         | 1.5051(7)  |
| P1B—O2B         | 1.5483(7) | P2C—O5C         | 1.5212(7)  |
| P1B—O3B         | 1.5515(7) | P2C—O6C         | 1.5678(7)  |
| P1B—P2B         | 2.1834(5) |                 |            |
| O1A—P1A—O2A     | 114.37(4) | O4B—P2B—O5B     | 115.11(4)  |
| O1A—P1A—O3A     | 112.28(4) | O4B—P2B—O6B     | 112.83(4)  |
| O2A—P1A—O3A     | 107.59(4) | O5B—P2B—O6B     | 105.28(4)  |
| O1A—P1A—P2A     | 108.21(3) | O4B—P2B—P1B     | 110.76(4)  |
| O2A—P1A—P2A     | 106.70(3) | O5B—P2B—P1B     | 106.49(3)  |
| O3A—P1A—P2A     | 107.32(3) | O6B—P2B—P1B     | 105.69(3)  |
| O4A—P2A—O5A     | 117.06(4) | O1C—P1C—O2C     | 116.65(4)  |
| O4A—P2A—O6A     | 112.59(4) | O1C—P1C—O3C     | 113.05(4)  |
| O5A—P2A—O6A     | 105.99(4) | O2C—P1C—O3C     | 106.28(4)  |
| O4A—P2A—P1A     | 107.76(3) | O1C—P1C—P2C     | 107.99(3)  |
| O5A—P2A—P1A     | 107.82(3) | O2C—P1C—P2C     | 108.05(3)  |
| O6A—P2A—P1A     | 104.89(4) | O3C—P1C—P2C     | 104.01(4)  |
| O1B—P1B—O2B     | 113.86(4) | O4C—P2C—O5C     | 114.49(4)  |
| O1B—P1B—O3B     | 113.96(4) | O4C—P2C—O6C     | 112.14(4)  |
| O2B—P1B—O3B     | 104.49(4) | O5C—P2C—O6C     | 107.42(4)  |
| O1B—P1B—P2B     | 110.74(4) | O4C—P2C—P1C     | 107.98(3)  |
| O2B—P1B—P2B     | 105.96(3) | O5C—P2C—P1C     | 107.63(3)  |
| O3B—P1B—P2B     | 107.24(3) | O6C—P2C—P1C     | 106.83(3)  |
| O1A—P1A—P2A—O4A | 43.02(4)  | O3B—P1B—P2B—O5B | -179.89(3) |
| O2A—P1A—P2A—O4A | -80.50(4) | O1B—P1B—P2B—O6B | 56.64(4)   |
| O3A—P1A—P2A—O4A | 164.40(4) | O2B—P1B—P2B—O6B | -179.43(3) |
| O1A—P1A—P2A—O5A | 170.22(4) | O3B—P1B—P2B—O6B | -68.26(4)  |
| O2A—P1A—P2A—O5A | 46.70(4)  | O1C—P1C—P2C—O4C | -43.50(4)  |
| O3A—P1A—P2A—O5A | -68.40(4) | O2C—P1C—P2C—O4C | -170.49(4) |
| O1A—P1A—P2A—O6A | -77.14(4) | O3C—P1C—P2C—O4C | 76.86(4)   |
| O2A—P1A—P2A—O6A | 159.33(4) | O1C—P1C—P2C—O5C | 80.59(4)   |
| O3A—P1A—P2A—O6A | 44.24(4)  | O2C—P1C—P2C—O5C | -46.41(4)  |

|                 |           |                 |            |
|-----------------|-----------|-----------------|------------|
| O1B—P1B—P2B—O4B | 179.16(4) | O3C—P1C—P2C—O5C | -159.06(4) |
| O2B—P1B—P2B—O4B | -56.91(4) | O1C—P1C—P2C—O6C | -164.30(4) |
| O3B—P1B—P2B—O4B | 54.26(4)  | O2C—P1C—P2C—O6C | 68.70(4)   |
| O1B—P1B—P2B—O5B | -55.00(4) | O3C—P1C—P2C—O6C | -43.95(4)  |
| O2B—P1B—P2B—O5B | 68.93(4)  |                 |            |

**Table S3.** Selected geometric parameters (Å, °) for (2)

|                 |            |                                            |            |
|-----------------|------------|--------------------------------------------|------------|
| P1A—O1A         | 1.483(4)   | P2A—O6A                                    | 1.563(4)   |
| P1A—O2A         | 1.551(4)   | P1B—O1B                                    | 1.510(3)   |
| P1A—O3A         | 1.558(4)   | P1B—O2B                                    | 1.511(3)   |
| P1A—P2A         | 2.1837(18) | P1B—O3B                                    | 1.566(4)   |
| P2A—O4A         | 1.501(4)   | P1B—P1B <sup>i</sup>                       | 2.189(2)   |
| P2A—O5A         | 1.504(4)   |                                            |            |
| O1A—P1A—O2A     | 115.4(2)   | O4A—P2A—P1A                                | 108.92(17) |
| O1A—P1A—O3A     | 115.4(2)   | O5A—P2A—P1A                                | 106.16(16) |
| O2A—P1A—O3A     | 101.3(2)   | O6A—P2A—P1A                                | 105.63(16) |
| O1A—P1A—P2A     | 110.69(17) | O1B—P1B—O2B                                | 114.2(2)   |
| O2A—P1A—P2A     | 106.04(16) | O1B—P1B—O3B                                | 108.8(2)   |
| O3A—P1A—P2A     | 107.17(16) | O2B—P1B—O3B                                | 110.9(2)   |
| O4A—P2A—O5A     | 117.1(2)   | O1B—P1B—P1B <sup>i</sup>                   | 108.77(16) |
| O4A—P2A—O6A     | 108.4(2)   | O2B—P1B—P1B <sup>i</sup>                   | 108.41(16) |
| O5A—P2A—O6A     | 110.0(2)   | O3B—P1B—P1B <sup>i</sup>                   | 105.39(16) |
| O1A—P1A—P2A—O4A | 77.9(3)    | O1B—P1B—P1B <sup>i</sup> —O1B <sup>i</sup> | 180        |
| O2A—P1A—P2A—O4A | -156.2(2)  | O2B—P1B—P1B <sup>i</sup> —O1B <sup>i</sup> | 55.3(2)    |
| O3A—P1A—P2A—O4A | -48.7(2)   | O3B—P1B—P1B <sup>i</sup> —O1B <sup>i</sup> | -63.5(2)   |
| O1A—P1A—P2A—O5A | -49.0(2)   | O1B—P1B—P1B <sup>i</sup> —O2B <sup>i</sup> | -55.3(2)   |
| O2A—P1A—P2A—O5A | 76.8(2)    | O2B—P1B—P1B <sup>i</sup> —O2B <sup>i</sup> | 180        |
| O3A—P1A—P2A—O5A | -175.6(2)  | O3B—P1B—P1B <sup>i</sup> —O2B <sup>i</sup> | 61.2(2)    |
| O1A—P1A—P2A—O6A | -165.8(2)  | O1B—P1B—P1B <sup>i</sup> —O3B <sup>i</sup> | 63.5(2)    |
| O2A—P1A—P2A—O6A | -39.9(2)   | O2B—P1B—P1B <sup>i</sup> —O3B <sup>i</sup> | -61.2(2)   |
| O3A—P1A—P2A—O6A | 67.6(2)    | O3B—P1B—P1B <sup>i</sup> —O3B <sup>i</sup> | 180        |

Symmetry code: (i)  $-x+1, -y+1, -z+1$ .

**Table S4.** Hydrogen-bond geometry (Å, °) for (1)-HTP

| <i>D</i> — <i>H</i> ··· <i>A</i>     | <i>D</i> — <i>H</i> | <i>H</i> ··· <i>A</i> | <i>D</i> ··· <i>A</i> | <i>D</i> — <i>H</i> ··· <i>A</i> |
|--------------------------------------|---------------------|-----------------------|-----------------------|----------------------------------|
| <b>O3A—H3PA···O1W</b>                | 0.758(15)           | 1.839(16)             | 2.5906(12)            | 171.3(16)                        |
| <b>O6A—H6PA···O1A<sup>I</sup></b>    | 0.880(14)           | 1.674(15)             | 2.5253(10)            | 161.9(14)                        |
| <b>O2B—H2PB···O5A<sup>II</sup></b>   | 1.12(3)             | 1.36(3)               | 2.4745(10)            | 179(2)                           |
| <b>O3B—H3PB···O2A</b>                | 1.03(2)             | 1.45(2)               | 2.4648(12)            | 167.8(19)                        |
| <b>N1A—H1N···O4A</b>                 | 0.927(19)           | 1.832(18)             | 2.750(5)              | 170.3(17)                        |
| <b>N3A—H3A1···O1B<sup>III</sup></b>  | 0.87                | 2.20                  | 3.043(4)              | 165                              |
| <b>N3A—H3A2···O5A<sup>IV</sup></b>   | 0.87                | 2.51                  | 3.283(4)              | 148                              |
| <b>N3A—H3A2···O6A<sup>IV</sup></b>   | 0.87                | 2.38                  | 3.142(4)              | 146                              |
| <b>C4A—H4A···O3A<sup>IV</sup></b>    | 0.94                | 2.59                  | 3.443(4)              | 151                              |
| <b>C6A—H6A···O1A</b>                 | 0.94                | 2.56                  | 3.296(5)              | 135                              |
| <b>N1X—H1N···O4A</b>                 | 0.861(18)           | 1.832(18)             | 2.668(5)              | 163.2(18)                        |
| <b>N3X—H3X1···O1B<sup>III</sup></b>  | 0.87                | 2.35                  | 3.132(4)              | 150                              |
| <b>N3X—H3X2···O5A<sup>IV</sup></b>   | 0.87                | 2.23                  | 3.089(4)              | 170                              |
| <b>C4X—H4X···O3A<sup>IV</sup></b>    | 0.94                | 2.56                  | 3.445(4)              | 157                              |
| <b>C6X—H6X···O1A</b>                 | 0.94                | 2.47                  | 3.262(4)              | 142                              |
| <b>N1B—H1NB···O1B</b>                | 0.880(16)           | 1.797(16)             | 2.6623(13)            | 167.2(16)                        |
| <b>N3B—H3B1···O1A<sup>V</sup></b>    | 0.972(15)           | 2.026(16)             | 2.9571(14)            | 159.9(12)                        |
| <b>N3B—H3B2···O2A<sup>VI</sup></b>   | 1.033(16)           | 1.974(16)             | 2.9682(14)            | 160.6(13)                        |
| <b>C2B—H2B···O1W<sup>V</sup></b>     | 0.94                | 2.41                  | 3.3502(17)            | 177                              |
| <b>C4B—H4B···O2B<sup>IV</sup></b>    | 0.94                | 2.62                  | 3.3698(17)            | 137                              |
| <b>C6B—H6B···O5A<sup>VII</sup></b>   | 0.94                | 2.44                  | 3.1996(15)            | 138                              |
| <b>O1W—H1W1···O3B<sup>VIII</sup></b> | 0.83                | 1.96                  | 2.786                 | 170                              |
| <b>O1W—H1W2···O4A<sup>I</sup></b>    | 0.83                | 1.94                  | 2.7653(11)            | 172                              |

Symmetry codes: (i)  $-x, -y+1, -z+2$ ; (ii)  $-x, -y, -z+1$ ; (iii)  $x, y+1, z$ ; (iv)  $x+1, y+1, z$ ; (v)  $x, y, z-1$ ; (vi)  $-x+1, -y+1, -z+1$ ; (vii)  $x+1, y, z$ ; (viii)  $-x, -y, -z+2$ .

**Table S5.** Hydrogen-bond geometry (Å, °) for (1)-LTP

| <i>D</i> — <i>H</i> ⋯ <i>A</i>     | <i>D</i> — <i>H</i> | <i>H</i> ⋯ <i>A</i> | <i>D</i> ⋯ <i>A</i> | <i>D</i> — <i>H</i> ⋯ <i>A</i> |
|------------------------------------|---------------------|---------------------|---------------------|--------------------------------|
| <b>O3A—H3PA⋯O1W</b>                | 0.859(16)           | 1.725(16)           | 2.580               | 173.2(16)                      |
| <b>O6A—H6PA⋯O4C<sup>I</sup></b>    | 0.749(17)           | 1.795(18)           | 2.5199(10)          | 162.7(18)                      |
| <b>O2B—H2PB⋯O2A</b>                | 0.80(2)             | 1.67(2)             | 2.4485(10)          | 165(2)                         |
| <b>O3B—H3PB⋯O2C</b>                | 1.09(2)             | 1.37(2)             | 2.4658(10)          | 178(2)                         |
| <b>O5B—H5PB⋯O5A</b>                | 1.19(3)             | 1.26(3)             | 2.4551(10)          | 177(2)                         |
| <b>O6B—H6PB⋯O5C</b>                | 0.81(2)             | 1.66(2)             | 2.4609(10)          | 166(2)                         |
| <b>O3C—H3PC⋯O1A<sup>II</sup></b>   | 0.757(18)           | 1.788(19)           | 2.5217(10)          | 162.9(19)                      |
| <b>O6C—H6PC⋯O2W</b>                | 0.834(16)           | 1.740(16)           | 2.570               | 173.4(16)                      |
| <b>N1A—H1NA⋯O4A</b>                | 0.853(14)           | 1.857(15)           | 2.6964(11)          | 167.5(14)                      |
| <b>N3A—H3A1⋯O6A<sup>III</sup></b>  | 0.825(15)           | 2.312(16)           | 3.0766(12)          | 154.4(14)                      |
| <b>N3A—H3A2⋯O4B<sup>IV</sup></b>   | 0.859(15)           | 2.197(15)           | 3.0500(12)          | 171.8(13)                      |
| <b>C4A—H4A⋯O6A<sup>III</sup></b>   | 0.95                | 2.60                | 3.3431(13)          | 135                            |
| <b>C6A—H6A⋯O1A</b>                 | 0.95                | 2.52                | 3.2767(12)          | 137                            |
| <b>N1B—H1NB⋯O1B</b>                | 0.884(13)           | 1.774(13)           | 2.6551(11)          | 174.7(13)                      |
| <b>N3B—H3B1⋯O5C<sup>III</sup></b>  | 0.941(14)           | 2.050(14)           | 2.9689(12)          | 165.0(12)                      |
| <b>N3B—H3B2⋯O4C<sup>V</sup></b>    | 0.975(17)           | 2.039(18)           | 2.9723(11)          | 159.5(14)                      |
| <b>C2B—H2B⋯O2W<sup>V</sup></b>     | 0.95                | 2.35                | 3.3016(13)          | 176                            |
| <b>C4B—H4B⋯O3B<sup>III</sup></b>   | 0.95                | 2.56                | 3.2935(12)          | 135                            |
| <b>C6B—H6B⋯O2C<sup>VI</sup></b>    | 0.95                | 2.48                | 3.2432(13)          | 137                            |
| <b>N1C—H1NC⋯O1C</b>                | 0.837(13)           | 1.875(13)           | 2.7046(11)          | 170.9(13)                      |
| <b>N3C—H3C1⋯O2C<sup>VII</sup></b>  | 0.837(14)           | 2.191(14)           | 3.0106(12)          | 166.3(14)                      |
| <b>N3C—H3C2⋯O1B<sup>VIII</sup></b> | 0.878(13)           | 2.198(13)           | 3.0668(13)          | 169.8(11)                      |
| <b>C2C—H2C⋯O3B<sup>VIII</sup></b>  | 0.95                | 2.53                | 3.4654(12)          | 167                            |
| <b>C4C—H4C⋯O6C<sup>VII</sup></b>   | 0.95                | 2.53                | 3.4149(13)          | 155                            |
| <b>C6C—H6C⋯O4C</b>                 | 0.95                | 2.47                | 3.2576(13)          | 140                            |
| <b>N1D—H1ND⋯O4B</b>                | 0.855(15)           | 1.842(15)           | 2.6675(11)          | 161.7(15)                      |
| <b>N3D—H3D1⋯O2A<sup>VII</sup></b>  | 0.946(15)           | 2.021(15)           | 2.9490(12)          | 166.6(13)                      |
| <b>N3D—H3D2⋯O1A<sup>IX</sup></b>   | 0.981(17)           | 1.969(17)           | 2.9131(11)          | 160.7(13)                      |
| <b>C2D—H2D⋯O1W<sup>IX</sup></b>    | 0.95                | 2.40                | 3.3488(14)          | 174                            |
| <b>C4D—H4D⋯O5B<sup>VII</sup></b>   | 0.95                | 2.60                | 3.3874(12)          | 140                            |
| <b>C6D—H6D⋯O5A<sup>X</sup></b>     | 0.95                | 2.40                | 3.1206(13)          | 133                            |

Symmetry codes: (i)  $x, y, z-1$ ; (ii)  $x, y, z+1$ ; (iii)  $x-1, y, z$ ; (iv)  $-x, -y+1, -z$ ; (v)  $-x, -y+1, -z+1$ ; (vi)  $-x, -y, -z+1$ ; (vii)  $x+1, y, z$ ; (viii)  $-x+1, -y, -z+1$ ; (ix)  $-x+1, -y, -z$ ; (x)  $-x+1, -y+1, -z$ .

**Table S6.** Hydrogen-bond geometry (Å, °) for (2)

| <i>D</i> — <i>H</i> ⋯ <i>A</i>                            | <i>D</i> — <i>H</i> | <i>H</i> ⋯ <i>A</i> | <i>D</i> ⋯ <i>A</i> | <i>D</i> — <i>H</i> ⋯ <i>A</i> |
|-----------------------------------------------------------|---------------------|---------------------|---------------------|--------------------------------|
| <b>O2A—H2PA⋯O1B<sup>I</sup></b>                           | 0.73(7)             | 1.77(7)             | 2.501(5)            | 179(9)                         |
| <b>O3A—H3PA⋯O4A<sup>II</sup></b>                          | 0.99(7)             | 1.56(7)             | 2.538(5)            | 169(6)                         |
| <b>O6A—H6PA⋯O2B</b>                                       | 0.73(7)             | 1.81(7)             | 2.532(5)            | 170(8)                         |
| <b>O3B—H3PB⋯O5A</b>                                       | 0.73(10)            | 1.90(10)            | 2.607(5)            | 162(11)                        |
| <b>N1A<sup>A</sup>—H1N<sup>A</sup>A⋯O1A<sup>III</sup></b> | 0.88                | 1.93                | 2.804(9)            | 173                            |
| <b>N3A<sup>A</sup>—H3A<sup>1</sup>A⋯O2A</b>               | 0.88                | 2.05                | 2.883(9)            | 157                            |
| <b>N3A<sup>A</sup>—H3A<sup>2</sup>A⋯O4A<sup>IV</sup></b>  | 0.88                | 1.93                | 2.808(9)            | 173                            |
| <b>C2A<sup>A</sup>—H2A<sup>A</sup>⋯O6A</b>                | 0.95                | 2.45                | 3.398(17)           | 178                            |
| <b>C6A<sup>A</sup>—H6A<sup>A</sup>⋯O3A<sup>V</sup></b>    | 0.95                | 2.47                | 3.093(13)           | 123                            |
| <b>N1X<sup>B</sup>—H1N<sup>X</sup>B⋯O4A<sup>IV</sup></b>  | 0.88                | 1.91                | 2.779(13)           | 170                            |
| <b>N3X<sup>B</sup>—H3X<sup>1</sup>B⋯O6A</b>               | 0.88                | 2.10                | 2.962(12)           | 167                            |
| <b>N3X<sup>B</sup>—H3X<sup>2</sup>B⋯O1A<sup>III</sup></b> | 0.88                | 1.94                | 2.808(13)           | 168                            |
| <b>N1B<sup>B</sup>—H1N<sup>B</sup>B⋯O5A<sup>VI</sup></b>  | 0.80(7)             | 1.90(7)             | 2.683(6)            | 168(7)                         |
| <b>N3B<sup>B</sup>—H3B<sup>1</sup>B⋯O2B</b>               | 0.91(7)             | 2.05(7)             | 2.928(6)            | 162(6)                         |
| <b>N3B<sup>B</sup>—H3B<sup>2</sup>B⋯O1B<sup>VII</sup></b> | 0.81(6)             | 2.15(6)             | 2.937(6)            | 165(6)                         |

Symmetry codes: (i)  $-x+1, -y+1, -z+1$ ; (ii)  $-x+2, -y+1, -z$ ; (iii)  $x, y+1, z$ ; (iv)  $x-1, y, z$ ; (v)  $-x+1, -y+2, -z$ ; (vi)  $x-1, y+1, z$ ; (vii)  $-x+1, -y+2, -z+1$ .

**Table S7.** Temperature dependence of sample composition during (1)→(2) dehydration as refined by Rietveld method (unknown decomposition product content is not taken into account).

| Temperature, K       | (1)-LTP, % | (1)-HTP, % | (2), % |
|----------------------|------------|------------|--------|
| 110                  | 100        | 0          | 0      |
| 295                  | 0          | 98         | 2      |
| 300                  | 0          | 95         | 5      |
| 305                  | 0          | 91         | 9      |
| 310                  | 0          | 86         | 14     |
| 315*                 | 0          | 79         | 21     |
| 320*                 | 0          | 70         | 30     |
| 325*                 | 0          | 61         | 39     |
| 330*                 | 0          | 50         | 50     |
| 330 (after 3 hours)* | 0          | 0          | 100    |

\* - unknown impurity is present in the sample

**Table S8.** Selected geometric parameters (Å, °) for **(3)**

|                                            |            |                                              |            |
|--------------------------------------------|------------|----------------------------------------------|------------|
| P1A—O1A                                    | 1.5229(10) | P1B—O1B                                      | 1.5012(10) |
| P1A—O2A                                    | 1.5259(10) | P1B—O2B                                      | 1.5165(10) |
| P1A—O3A                                    | 1.5378(10) | P1B—O3B                                      | 1.5760(10) |
| P1A—P1A <sup>i</sup>                       | 2.1884(7)  | P1B—P1B <sup>ii</sup>                        | 2.1922(7)  |
| O1A—P1A—O2A                                | 112.45(6)  | O1B—P1B—O2B                                  | 116.57(6)  |
| O1A—P1A—O3A                                | 112.00(6)  | O1B—P1B—O3B                                  | 111.40(6)  |
| O2A—P1A—O3A                                | 110.35(6)  | O2B—P1B—O3B                                  | 106.42(6)  |
| O1A—P1A—P1A <sup>i</sup>                   | 107.84(5)  | O1B—P1B—P1B <sup>ii</sup>                    | 108.96(5)  |
| O2A—P1A—P1A <sup>i</sup>                   | 106.73(4)  | O2B—P1B—P1B <sup>ii</sup>                    | 108.00(4)  |
| O3A—P1A—P1A <sup>i</sup>                   | 107.16(5)  | O3B—P1B—P1B <sup>ii</sup>                    | 104.79(4)  |
| O1A—P1A—P1A <sup>i</sup> —O1A <sup>i</sup> | 180        | O1B—P1B—P1B <sup>ii</sup> —O1B <sup>ii</sup> | 180        |
| O2A—P1A—P1A <sup>i</sup> —O1A <sup>i</sup> | 58.96(6)   | O2B—P1B—P1B <sup>ii</sup> —O1B <sup>ii</sup> | 52.48(7)   |
| O3A—P1A—P1A <sup>i</sup> —O1A <sup>i</sup> | -59.26(7)  | O3B—P1B—P1B <sup>ii</sup> —O1B <sup>ii</sup> | -60.67(6)  |
| O1A—P1A—P1A <sup>i</sup> —O2A <sup>i</sup> | -58.96(6)  | O1B—P1B—P1B <sup>ii</sup> —O2B <sup>ii</sup> | -52.48(7)  |
| O2A—P1A—P1A <sup>i</sup> —O2A <sup>i</sup> | 180        | O2B—P1B—P1B <sup>ii</sup> —O2B <sup>ii</sup> | 180        |
| O3A—P1A—P1A <sup>i</sup> —O2A <sup>i</sup> | 61.78(6)   | O3B—P1B—P1B <sup>ii</sup> —O2B <sup>ii</sup> | 66.84(6)   |
| O1A—P1A—P1A <sup>i</sup> —O3A <sup>i</sup> | 59.26(7)   | O1B—P1B—P1B <sup>ii</sup> —O3B <sup>ii</sup> | 60.67(6)   |
| O2A—P1A—P1A <sup>i</sup> —O3A <sup>i</sup> | -61.78(6)  | O2B—P1B—P1B <sup>ii</sup> —O3B <sup>ii</sup> | -66.84(6)  |
| O3A—P1A—P1A <sup>i</sup> —O3A <sup>i</sup> | 180        | O3B—P1B—P1B <sup>ii</sup> —O3B <sup>ii</sup> | 180        |

Symmetry codes: (i)  $-x+1, -y+1, -z+1$ ; (ii)  $-x, -y+1, -z+1$ .**Table S9.** Selected geometric parameters (Å, °) for **(4)**

|             |             |             |             |
|-------------|-------------|-------------|-------------|
| P1—O1       | 1.5102(19)  | P2—O4       | 1.501 (2)   |
| P1—O2       | 1.5227(19)  | P2—O5       | 1.515(2)    |
| P1—O3       | 1.5587(19)  | P2—O6       | 1.5678(19)  |
| P1—P2       | 2.1763(9)   |             |             |
| O1—P1—O2    | 115.49(11)  | O4—P2—O5    | 114.61(11)  |
| O1—P1—O3    | 108.47(10)  | O4—P2—O6    | 109.03(11)  |
| O2—P1—O3    | 111.18(11)  | O5—P2—O6    | 111.92(11)  |
| O1—P1—P2    | 110.06(8)   | O4—P2—P1    | 107.30(8)   |
| O2—P1—P2    | 104.16(8)   | O5—P2—P1    | 110.80(8)   |
| O3—P1—P2    | 107.13(8)   | O6—P2—P1    | 102.39(9)   |
| O1—P1—P2—O4 | 73.55(12)   | O3—P1—P2—O5 | 65.49(12)   |
| O2—P1—P2—O4 | -50.83(11)  | O1—P1—P2—O6 | -171.74(12) |
| O3—P1—P2—O4 | -168.71(12) | O2—P1—P2—O6 | 63.88(12)   |
| O1—P1—P2—O5 | -52.24(12)  | O3—P1—P2—O6 | -54.00(12)  |
| O2—P1—P2—O5 | -176.63(11) |             |             |

**Table S10.** Hydrogen-bond geometry (Å, °) for (3)

| <i>D—H···A</i>                      | <i>D—H</i> | <i>H···A</i> | <i>D···A</i> | <i>D—H···A</i> |
|-------------------------------------|------------|--------------|--------------|----------------|
| <b>O3B—H3PB···O1A</b>               | 0.90(2)    | 1.64(2)      | 2.5314(14)   | 170(2)         |
| <b>N1A—H1NA···O2A</b>               | 0.95(2)    | 1.63(2)      | 2.5671(16)   | 169(2)         |
| <b>N3A—H3A1···O2B<sup>III</sup></b> | 0.87(2)    | 2.13(2)      | 2.9762(17)   | 164.3(18)      |
| <b>N3A—H3A2···O1B<sup>IV</sup></b>  | 0.87(2)    | 2.12(2)      | 2.9606(17)   | 162.6(17)      |
| <b>C2A—H2A···O1A<sup>I</sup></b>    | 0.95       | 2.41         | 3.1899(18)   | 140            |
| <b>C4A—H4A···O1B<sup>IV</sup></b>   | 0.95       | 2.50         | 3.2769(18)   | 139            |
| <b>N1B—H1NB···O3A</b>               | 1.08(2)    | 1.45(3)      | 2.5206(16)   | 174(2)         |
| <b>N3B—H3B1···O2B<sup>I</sup></b>   | 0.85(2)    | 2.59(2)      | 3.3158(18)   | 144.2(16)      |
| <b>N3B—H3B1···O3B<sup>I</sup></b>   | 0.85(2)    | 2.55(2)      | 3.3002(18)   | 148.7(16)      |
| <b>N3B—H3B2···O1W<sup>V</sup></b>   | 0.86(2)    | 2.00(2)      | 2.8503(18)   | 168.0(18)      |
| <b>C2B—H2B···O3B<sup>I</sup></b>    | 0.95       | 2.37         | 3.2427(19)   | 152            |
| <b>N1C—H1NC···O2B</b>               | 0.95(2)    | 1.67(2)      | 2.6138(16)   | 171.7(19)      |
| <b>N3C—H3C1···O1W<sup>VI</sup></b>  | 0.83(2)    | 2.05(2)      | 2.8646(19)   | 167.9(19)      |
| <b>N3C—H3C2···O3A<sup>II</sup></b>  | 0.86(2)    | 2.07(2)      | 2.9063(19)   | 162.4(19)      |
| <b>C2C—H2C···O1A<sup>II</sup></b>   | 0.95       | 2.48         | 3.4217(19)   | 174            |
| <b>O1W—H1W1···O1B</b>               | 0.84       | 1.87         | 2.7058(14)   | 176            |
| <b>O1W—H1W2···O2A</b>               | 0.84       | 1.88         | 2.7155(14)   | 177            |

Symmetry codes: (i)  $-x+1, -y+1, -z+1$ ; (ii)  $-x, -y+1, -z+1$ ; (iii)  $x+1, y, z$ ; (iv)  $x+1, -y+1/2, z+1/2$ ; (v)  $-x+1, y+1/2, -z+1/2$ ; (vi)  $-x, y+1/2, -z+3/2$ .

**Table S11.** Hydrogen-bond geometry (Å, °) for (4)

| <i>D</i> — <i>H</i> ⋯ <i>A</i>  | <i>D</i> — <i>H</i> | <i>H</i> ⋯ <i>A</i> | <i>D</i> ⋯ <i>A</i> | <i>D</i> — <i>H</i> ⋯ <i>A</i> |
|---------------------------------|---------------------|---------------------|---------------------|--------------------------------|
| <b>O3—H3P⋯N1A</b>               | 0.84                | 1.77                | 2.556(3)            | 155                            |
| <b>O6—H6P⋯O1<sup>I</sup></b>    | 0.84                | 1.79                | 2.549(3)            | 149                            |
| <b>N3A—H3A1⋯O5<sup>II</sup></b> | 0.90(5)             | 2.23(4)             | 3.083(3)            | 159(4)                         |
| <b>N3A—H3A2⋯O2<sup>I</sup></b>  | 0.89(4)             | 2.08(4)             | 2.934(3)            | 161(3)                         |
| <b>C4A—H4A⋯O3<sup>III</sup></b> | 0.95                | 2.58                | 3.176(4)            | 121                            |
| <b>C5A—H5A⋯O3<sup>III</sup></b> | 0.95                | 2.59                | 3.178(4)            | 121                            |
| <b>N1B—H1NB⋯O2<sup>I</sup></b>  | 1.05(4)             | 1.54(4)             | 2.589(3)            | 175(4)                         |
| <b>N3B—H3B1⋯O4<sup>IV</sup></b> | 0.87(4)             | 1.93(4)             | 2.783(3)            | 168(3)                         |
| <b>N3B—H3B2⋯O2</b>              | 0.84(4)             | 2.13(4)             | 2.945(3)            | 165(4)                         |
| <b>C2B—H2B⋯O6</b>               | 0.95                | 2.39                | 3.272(3)            | 154                            |
| <b>N1C—H1NC⋯O5<sup>V</sup></b>  | 0.92(4)             | 1.69(4)             | 2.609(3)            | 174(4)                         |
| <b>N3C—H3C1⋯O4<sup>VI</sup></b> | 0.83(4)             | 2.01(4)             | 2.812(3)            | 162(4)                         |
| <b>N3C—H3C2⋯O5</b>              | 0.95(5)             | 2.09(4)             | 3.005(3)            | 161(4)                         |
| <b>C2C—H2C⋯O1</b>               | 0.95                | 2.31                | 3.154(3)            | 147                            |

Symmetry codes: (i)  $x-1/2, -y+1/2, z$ ; (ii)  $-x+1/2, y+1/2, z+1/2$ ; (iii)  $-x+1, -y+1, z+1/2$ ; (iv)  $-x+1, -y, z+1/2$ ; (v)  $x+1/2, -y+1/2, z$ ; (vi)  $-x+1, -y, z-1/2$ .



**Table S12.** Temperature dependence of sample composition during (3)→(4) dehydration as refined by Rietveld method (unknown decomposition product content is not taken into account).

| Temperature, K          | (3), % | (4), % |
|-------------------------|--------|--------|
| 100                     | 100    | 0      |
| 295                     | 100    | 0      |
| 300                     | 100    | 0      |
| 305                     | 100    | 0      |
| 310                     | 100    | 0      |
| 315                     | 100    | 0      |
| 320                     | 100    | 0      |
| 325                     | 100    | 0      |
| 330                     | 100    | 0      |
| 335                     | 96     | 4      |
| 340                     | 91     | 9      |
| 345                     | 84     | 16     |
| 350                     | 74     | 26     |
| 355*                    | 57     | 43     |
| 360*                    | 32     | 68     |
| 360 (after 30 minutes)* | 19     | 81     |

\* - unknown impurity is present in the sample

**Table S13.** Selected geometric parameters (Å, °) for (5)

|             |            |             |            |
|-------------|------------|-------------|------------|
| P1—O1       | 1.5012(18) | P2—O4       | 1.5022(19) |
| P1—O2       | 1.5250(16) | P2—O5       | 1.5217(17) |
| P1—O3       | 1.581(2)   | P2—O6       | 1.5811(18) |
| P1—P2       | 2.1914(11) |             |            |
| O1—P1—O2    | 116.85(10) | O4—P2—O5    | 115.90(10) |
| O1—P1—O3    | 111.58(10) | O4—P2—O6    | 109.39(11) |
| O2—P1—O3    | 106.78(10) | O5—P2—O6    | 108.90(10) |
| O1—P1—P2    | 105.22(7)  | O4—P2—P1    | 106.53(8)  |
| O2—P1—P2    | 108.87(7)  | O5—P2—P1    | 107.23(8)  |
| O3—P1—P2    | 107.16(7)  | O6—P2—P1    | 108.65(7)  |
| O1—P1—P2—O4 | 46.50 (11) | O3—P1—P2—O5 | 40.69(11)  |
| O2—P1—P2—O4 | -79.49(11) | O1—P1—P2—O6 | 164.25(11) |
| O3—P1—P2—O4 | 165.37(10) | O2—P1—P2—O6 | 38.27(12)  |
| O1—P1—P2—O5 | -78.19(11) | O3—P1—P2—O6 | -76.88(11) |
| O2—P1—P2—O5 | 155.83(11) |             |            |

**Table S14.** Hydrogen-bond geometry (Å, °) for (5)

| <i>D</i> —H··· <i>A</i>           | <i>D</i> —H | H··· <i>A</i> | <i>D</i> ··· <i>A</i> | <i>D</i> —H··· <i>A</i> |
|-----------------------------------|-------------|---------------|-----------------------|-------------------------|
| <b>O3—H3P···O5<sup>I</sup></b>    | 0.82(4)     | 1.77(4)       | 2.582(3)              | 168(4)                  |
| <b>O6—H6P···O2<sup>II</sup></b>   | 0.92(5)     | 1.65(5)       | 2.573(3)              | 176(4)                  |
| <b>N1—H1N···O2</b>                | 0.91(4)     | 1.73(4)       | 2.630(3)              | 174(3)                  |
| <b>N3—H3N2···O1<sup>III</sup></b> | 0.91        | 1.80          | 2.704(3)              | 171                     |
| <b>N3—H3N1···O4<sup>IV</sup></b>  | 0.91        | 1.80          | 2.699(3)              | 167                     |
| <b>N3—H3C···O5<sup>V</sup></b>    | 0.91        | 1.82          | 2.718(3)              | 171                     |
| <b>C2—H2···O1<sup>III</sup></b>   | 0.95        | 2.39          | 3.131(3)              | 134                     |
| <b>C4—H4···O6<sup>IV</sup></b>    | 0.95        | 2.46          | 3.375(3)              | 162                     |
| <b>C5—H5···O5<sup>VI</sup></b>    | 0.95        | 2.43          | 3.381(3)              | 174                     |

Symmetry codes: (i)  $-x+2, -y, -z+1$ ; (ii)  $-x+2, -y+1, -z+1$ ; (iii)  $x, y+1, z$ ; (iv)  $-x+1, -y+1, -z$ ; (v)  $x-1, y+1, z$ ; (vi)  $-x+1, -y, -z$ .
